# Supplementary material
Source: PubMed Central journal article supplement (PMC3024309)
Supplement: pgen.1001276.s005.pdf [file pgen.1001276.s005.pdf]

| Factor  | Q-value  | mean(LOD <sub>s</sub> ) | Covariate       |
|---------|----------|-------------------------|-----------------|
| Oaf1p   | 2.04E-02 | 49.7 ( $r^2=0.34$ )     | Probe           |
| Pdr3p   | 1.50E-02 | 14.7                    | SNP XV 136324   |
| Reb1p   | 2.57E-03 | 21.5 ( $r^2=0.17$ )     | Probe           |
| Thi2p   | 0.00E+00 | 51.8                    | SNP VI 5852     |
| Kar4p   | 0.00E+00 | 28.0                    | SNP V 166032    |
| Hcm1p   | 3.93E-03 | 43.4                    | Env             |
| Rpn4p   | 7.18E-03 | 54.9                    | Env             |
| Rpn4p   | 1.97E-02 | 29.6 ( $r^2=0.21$ )     | Probe           |
| Nrg1p   | 0.00E+00 | 70.0                    | Env             |
| Pdc2p   | 1.19E-02 | 16.2                    | SNP XII 635380  |
| Ino2p   | 6.50E-03 | 13.4                    | SNP II 603790   |
| Ume6p   | 3.14E-02 | 16.1                    | Env             |
| Adr1p   | 7.71E-03 | 58.3                    | Env             |
| Adr1p   | 0.00E+00 | 65.1 ( $r^2=0.39$ )     | Probe           |
| Met32p  | 0.00E+00 | 43.6                    | SNP IX 214482   |
| Met32p  | 0.00E+00 | 27.8 ( $r^2=0.22$ )     | Probe           |
| Sum1p   | 0.00E+00 | 26.4                    | SNP XV 747543   |
| Mig3p   | 4.89E-03 | 18.6                    | SNP II 681361   |
| Dot6p   | 5.62E-03 | 59.3                    | Env             |
| Dot6p   | 2.57E-02 | 10.5 ( $r^2=0.09$ )     | Probe           |
| Spt2p   | 5.26E-06 | 32.3                    | SNP XV 10331    |
| Cdc14p  | 0.00E+00 | 44.4                    | SNP X 325500    |
| Pho4p   | 1.89E-02 | 17.6                    | SNP XIII 46084  |
| Mig1p   | 4.74E-02 | 100.9                   | Env             |
| Mig1p   | 5.11E-03 | 41.7 ( $r^2=0.30$ )     | Probe           |
| Aft1p   | 1.10E-02 | 55.7                    | Env             |
| Aft1p   | 2.26E-02 | 8.1 ( $r^2=0.07$ )      | Probe           |
| Hsf1p   | 1.54E-04 | 66.1                    | Env             |
| Hsf1p   | 5.14E-03 | 29.8 ( $r^2=0.23$ )     | Probe           |
| Tos8p   | 1.56E-02 | 51.3                    | Env             |
| Gts1p   | 9.75E-05 | 34.8                    | SNP V 13213     |
| Opi1p   | 1.29E-03 | 23.8                    | SNP V 15817     |
| Stp2p   | 1.70E-02 | 52.8 ( $r^2=0.35$ )     | Probe           |
| Rsc30p  | 3.54E-03 | 23.2                    | SNP VIII 221933 |
| Ste12p  | 0.00E+00 | 200.1                   | Env             |
| Ste12p  | 4.00E-05 | 80.4 ( $r^2=0.50$ )     | Probe           |
| Xbp1p   | 3.57E-02 | 19.5                    | SNP IX 79793    |
| Yap5p   | 2.72E-02 | 15.2 ( $r^2=0.13$ )     | Probe           |
| Dal81p  | 1.11E-02 | 7.6 ( $r^2=0.07$ )      | Probe           |
| Zap1p   | 8.06E-05 | 49.9                    | Env             |
| Zap1p   | 2.43E-02 | 18.7 ( $r^2=0.15$ )     | Probe           |
| Gzf3p   | 0.00E+00 | 279.7                   | SNP III 201166  |
| YJL206C | 4.79E-02 | 34.2                    | SNP VIII 111686 |
| Cbf1p   | 2.68E-02 | 43.0                    | Env             |
| Phd1p   | 4.71E-02 | 18.5 ( $r^2=0.15$ )     | Probe           |

| Factor | Q-value  | mean(LOD <sub>s</sub> ) | Covariate      |
|--------|----------|-------------------------|----------------|
| Msn4p  | 1.82E-02 | 37.7 ( $r^2=0.28$ )     | Probe          |
| Hap4p  | 1.68E-02 | 51.5 ( $r^2=0.32$ )     | Probe          |
| Abf1p  | 0.00E+00 | 72.7                    | Env            |
| Ash1p  | 2.65E-02 | 18.3                    | SNP IV 1272737 |
| Ash1p  | 2.52E-02 | 5.6 ( $r^2=0.05$ )      | Probe          |
| Bas1p  | 1.34E-02 | 79.7                    | SNP IV 289639  |
| Bas1p  | 1.36E-02 | 11.2                    | Env            |
| Ace2p  | 0.00E+00 | 35.2                    | SNP II 489202  |
| Ifh1p  | 3.11E-02 | 8.8                     | Env            |
| Hap1p  | 0.00E+00 | 39.3                    | SNP XII 607076 |
| Hap1p  | 0.00E+00 | 105.9 ( $r^2=0.62$ )    | Probe          |
| Pdr8p  | 5.95E-03 | 15.1                    | SNP XII 27765  |
| Sfp1p  | 1.84E-02 | 76.1                    | Env            |
| Sfp1p  | 3.76E-04 | 21.2 ( $r^2=0.17$ )     | Probe          |
| Yap1p  | 1.33E-02 | 200.5                   | Env            |
| Yap1p  | 0.00E+00 | 93.5 ( $r^2=0.52$ )     | Probe          |
| Yox1p  | 7.67E-04 | 99.3                    | Env            |
| Yox1p  | 3.71E-02 | 6.1 ( $r^2=0.05$ )      | Probe          |
| War1p  | 0.00E+00 | 38.3                    | SNP III 301446 |
| Sok2p  | 1.00E-02 | 50.7                    | Env            |
| Msn2p  | 3.24E-02 | 42.8                    | Env            |
| Mcm1p  | 4.42E-03 | 49.0                    | Env            |
| Fkh2p  | 8.84E-03 | 26.6                    | Env            |
| Met4p  | 0.00E+00 | 118.0                   | Env            |
| Met4p  | 0.00E+00 | 75.1 ( $r^2=0.47$ )     | Probe          |
| Sko1p  | 7.20E-03 | 42.0                    | SNP XV 180210  |
| Gcr2p  | 3.72E-04 | 24.9                    | SNP XIV 486861 |
| Rap1p  | 1.06E-02 | 69.4                    | Env            |
| Gis2p  | 3.84E-02 | 11.9                    | SNP XIV 582954 |
| Stb1p  | 1.04E-03 | 36.8                    | SNP IV 1188862 |
| Rtg1p  | 2.81E-02 | 11.5                    | Env            |
| Rtg1p  | 2.05E-03 | 12.7 ( $r^2=0.11$ )     | Probe          |
| Ino4p  | 0.00E+00 | 108.2                   | Env            |
| Cin5p  | 6.66E-04 | 55.3                    | Env            |
| Hms1p  | 3.89E-02 | 31.0                    | Env            |
| Sfl1p  | 0.00E+00 | 34.9                    | SNP I 199750   |
| Yrr1p  | 2.63E-02 | 24.6 ( $r^2=0.19$ )     | Probe          |
| Pip2p  | 2.66E-02 | 85.4                    | SNP I 36900    |
| Pip2p  | 0.00E+00 | 51.5 ( $r^2=0.36$ )     | Probe          |
| Aft2p  | 3.27E-02 | 36.3                    | Env            |
| Usv1p  | 7.49E-03 | 32.1                    | SNP XI 79182   |
| Rox1p  | 4.07E-02 | 37.8                    | Env            |
| Rox1p  | 2.30E-02 | 20.6 ( $r^2=0.16$ )     | Probe          |
| Arr1p  | 0.00E+00 | 156.6                   | Env            |
