# Supplementary material
Source: PubMed Central journal article supplement (PMC3024309)
Supplement: pgen.1001276.s007.pdf [file pgen.1001276.s007.pdf]

| Factor    | Q-value  | mean(LOD <sub>s</sub> ) | Covariate       |
|-----------|----------|-------------------------|-----------------|
| Factor 1  | 0.00E+00 | 282.1                   | Env             |
| Factor 3  | 0.00E+00 | 20.2                    | SNP XV 89211    |
| Factor 4  | 0.00E+00 | 53.8                    | SNP XIV 449639  |
| Factor 5  | 1.90E-02 | 9.8                     | SNP XIV 449639  |
| Factor 6  | 1.14E-02 | 10.9                    | SNP II 517365   |
| Factor 7  | 2.19E-04 | 16.3                    | SNP XII 668249  |
| Factor 8  | 7.59E-03 | 11.6                    | SNP XIV 449639  |
| Factor 9  | 1.54E-02 | 10.3                    | SNP XIII 481094 |
| Factor 10 | 0.00E+00 | 21.8                    | SNP XII 607076  |
| Factor 11 | 0.00E+00 | 20.8                    | SNP II 551299   |
| Factor 12 | 8.82E-05 | 17.3                    | SNP II 602012   |
| Factor 13 | 9.17E-03 | 11.3                    | SNP XI 180221   |
| Factor 14 | 8.59E-03 | 11.4                    | SNP III 76127   |
| Factor 15 | 7.60E-03 | 11.5                    | SNP XIII 410287 |
| Factor 16 | 7.13E-03 | 11.7                    | SNP III 91287   |
| Factor 17 | 1.39E-02 | 10.5                    | SNP XV 54769    |
| Factor 18 | 1.65E-02 | 10.1                    | SNP XV 619862   |
| Factor 19 | 0.00E+00 | 20.2                    | SNP II 517123   |
| Factor 20 | 1.71E-03 | 13.9                    | SNP XV 842027   |
| Factor 21 | 0.00E+00 | 24.1                    | SNP V 395442    |
| Factor 22 | 2.42E-02 | 9.4                     | SNP I 136161    |
| Factor 23 | 0.00E+00 | 20.7                    | SNP III 76127   |
| Factor 25 | 4.07E-02 | 8.5                     | SNP IX 21455    |
| Factor 26 | 1.23E-02 | 10.8                    | SNP XV 338018   |
| Factor 27 | 3.32E-02 | 8.9                     | SNP IV 1471859  |
| Factor 28 | 2.65E-02 | 9.3                     | SNP IV 1240245  |
| Factor 29 | 2.18E-02 | 9.6                     | SNP VII 940590  |
| Factor 30 | 1.21E-02 | 10.8                    | SNP IV 733875   |
