# Supplementary material
Source: PubMed Central journal article supplement (PMC3024309)
Supplement: pgen.1001276.s008.pdf [file pgen.1001276.s008.pdf]

| Locus      | Factor | Q-value  | mean(LOD <sub>s</sub> ) |
|------------|--------|----------|-------------------------|
| II 517365  | Ino2p  | 6.50E-03 | 13.4                    |
| II 517365  | Ace2p  | 0.00E+00 | 35.2                    |
| II 620056  | Mig3p  | 4.89E-03 | 18.6                    |
| II 620056  | Ino2p  | 1.66E-02 | 11.2                    |
| II 620056  | Ace2p  | 0.00E+00 | 66.6                    |
| III 90610  | Pho4p  | 4.95E-02 | 12.0                    |
| III 90610  | Thi2p  | 1.10E-02 | 12.5                    |
| III 90610  | Gzf3p  | 9.49E-05 | 141.7                   |
| IV 1272737 | Ash1p  | 2.65E-02 | 18.3                    |
| IV 1272737 | Stb1p  | 1.04E-03 | 36.8                    |
| V 6335     | Gts1p  | 9.75E-05 | 34.8                    |
| V 6335     | Opi1p  | 1.29E-03 | 23.8                    |
| V 395442   | Rsc30p | 3.52E-02 | 11.8                    |
| V 395442   | Sfl1p  | 1.41E-02 | 33.0                    |
| V 511793   | Gts1p  | 4.65E-02 | 13.0                    |
| V 511793   | Rsc30p | 6.38E-03 | 18.2                    |
| V 511793   | Hap1p  | 1.72E-02 | 10.8                    |
| V 511793   | Sfl1p  | 2.64E-02 | 21.4                    |
| VII 449898 | Gzf3p  | 1.97E-02 | 11.5                    |
| VII 449898 | Pdr8p  | 7.29E-03 | 18.4                    |
| VII 553877 | Gzf3p  | 1.98E-02 | 17.0                    |
| VII 553877 | Pdr8p  | 1.54E-02 | 15.4                    |
| XII 611810 | Hap1p  | 0.00E+00 | 39.3                    |
| XII 611810 | Pdc2p  | 1.19E-02 | 16.2                    |
| XII 611810 | Pdr8p  | 1.95E-02 | 12.6                    |
| XV 108577  | Pdr3p  | 1.50E-02 | 14.7                    |
| XV 108577  | Spt2p  | 5.26E-06 | 32.3                    |
| XV 108577  | Sko1p  | 7.20E-03 | 42.0                    |
| XVI 932310 | Rsc30p | 1.82E-02 | 14.4                    |
| XVI 932310 | Sfl1p  | 2.97E-02 | 15.4                    |
