# Supplementary material
Source: PubMed Central journal article supplement (PMC3024309)
Supplement: pgen.1001276.s009.pdf [file pgen.1001276.s009.pdf]

| Locus      | Factor                              | Q-value  | mean(LOD <sub>s</sub> ) |
|------------|-------------------------------------|----------|-------------------------|
| XIV 449639 | N-Glycan biosynthesis (00510)       | 4.22E-02 | 11.4                    |
| XIV 449639 | Aminoacyl-tRNA biosynthesis (00970) | 4.05E-02 | 25.4                    |
