# Supplementary material
Source: PubMed Central journal article supplement (PMC3024309)
Supplement: pgen.1001276.s010.pdf [file pgen.1001276.s010.pdf]

| Locus      | Factor    | Q-value  | mean(LOD <sub>s</sub> ) |
|------------|-----------|----------|-------------------------|
| II 514035  | Factor 6  | 1.14E-02 | 10.9                    |
| II 514035  | Factor 7  | 4.11E-02 | 8.4                     |
| II 514035  | Factor 11 | 0.00E+00 | 20.8                    |
| II 514035  | Factor 12 | 8.82E-05 | 17.3                    |
| II 514035  | Factor 15 | 4.09E-02 | 8.5                     |
| II 514035  | Factor 19 | 0.00E+00 | 20.2                    |
| II 514035  | Factor 22 | 3.34E-02 | 8.9                     |
| II 514035  | Factor 28 | 3.01E-02 | 9.1                     |
| II 615927  | Factor 11 | 1.56E-03 | 14.1                    |
| II 615927  | Factor 12 | 7.50E-04 | 15.3                    |
| II 615927  | Factor 19 | 3.33E-05 | 18.1                    |
| III 79091  | Factor 16 | 7.13E-03 | 11.7                    |
| III 79091  | Factor 14 | 8.59E-03 | 11.4                    |
| III 79091  | Factor 23 | 0.00E+00 | 20.7                    |
| III 79091  | Factor 8  | 3.55E-02 | 8.7                     |
| III 201167 | Factor 23 | 3.46E-02 | 8.8                     |
| III 201167 | Factor 15 | 3.32E-02 | 8.9                     |
| IV 154436  | Factor 9  | 3.76E-02 | 8.6                     |
| IV 154436  | Factor 18 | 3.11E-02 | 9.0                     |
| IV 154436  | Factor 26 | 1.44E-02 | 10.4                    |
| V 350744   | Factor 21 | 0.00E+00 | 24.1                    |
| V 350744   | Factor 13 | 4.20E-02 | 8.4                     |
| IX 242417  | Factor 3  | 2.11E-02 | 9.6                     |
| IX 242417  | Factor 15 | 4.54E-02 | 8.3                     |
| XI 178408  | Factor 26 | 4.71E-02 | 8.1                     |
| XI 178408  | Factor 13 | 9.17E-03 | 11.3                    |
| XII 634225 | Factor 10 | 0.00E+00 | 21.8                    |
| XII 634225 | Factor 11 | 3.14E-05 | 17.7                    |
| XII 634225 | Factor 5  | 2.38E-02 | 9.5                     |
| XII 634225 | Factor 7  | 2.19E-04 | 16.3                    |
| XII 744310 | Factor 10 | 1.65E-02 | 10.2                    |
| XII 744310 | Factor 3  | 2.33E-02 | 9.5                     |
| XII 744310 | Factor 11 | 1.17E-02 | 10.9                    |
| XIII 33501 | Factor 6  | 1.51E-02 | 10.3                    |
| XIII 33501 | Factor 15 | 2.61E-02 | 9.4                     |
| XIII 33501 | Factor 22 | 4.89E-02 | 8.0                     |
| XIV 449639 | Factor 4  | 0.00E+00 | 53.8                    |
| XIV 449639 | Factor 5  | 1.90E-02 | 9.8                     |
| XIV 449639 | Factor 8  | 7.59E-03 | 11.6                    |
| XIV 549682 | Factor 4  | 1.27E-03 | 14.7                    |
| XIV 549682 | Factor 15 | 4.50E-02 | 8.3                     |
| XV 143597  | Factor 17 | 1.39E-02 | 10.5                    |
| XV 143597  | Factor 3  | 0.00E+00 | 20.2                    |
| XV 143597  | Factor 12 | 2.82E-02 | 9.2                     |
| XV 143597  | Factor 23 | 1.72E-03 | 13.9                    |
