# Supplementary material
Source: PubMed Central journal article supplement (PMC3024309)
Supplement: pgen.1001276.s011.pdf [file pgen.1001276.s011.pdf]

| Locus | Chr | Pos.   | 1. Probes<br>with <i>trans</i><br>associations | 2. Probes<br>with down-<br>stream<br>factor asso-<br>ciations | 3. (2.) with<br>stronger<br>factor<br>association | 1.&2 | $\frac{1.&2.}{1.}$ | $\frac{1.&3.}{1.}$ | $\frac{1.&3.}{1.&2.}$ |
|-------|-----|--------|------------------------------------------------|---------------------------------------------------------------|---------------------------------------------------|------|--------------------|--------------------|-----------------------|
| OAF1  | 1   | 41483  | 58                                             | 12                                                            | 12                                                | 6    | 0.10               | 0.10               | 1.00                  |
| AMN1  | 2   | 555575 | 110                                            | 61                                                            | 61                                                | 29   | 0.26               | 0.26               | 1.00                  |
| MAT   | 3   | 201167 | 46                                             | 12                                                            | 12                                                | 6    | 0.13               | 0.13               | 1.00                  |
|       | 9   | 190794 | 86                                             | 23                                                            | 22                                                | 4    | 0.05               | 0.03               | 0.75                  |
| HAP1  | 12  | 644082 | 169                                            | 83                                                            | 80                                                | 44   | 0.26               | 0.25               | 0.98                  |
| PHO84 | 13  | 46084  | 72                                             | 74                                                            | 74                                                | 14   | 0.19               | 0.19               | 1.00                  |
| MKT1  | 14  | 449639 | 553                                            | 39                                                            | 38                                                | 12   | 0.02               | 0.02               | 0.92                  |
| IRA2  | 15  | 174364 | 743                                            | 283                                                           | 281                                               | 151  | 0.20               | 0.20               | 0.99                  |
| CIN5  | 15  | 392765 | 72                                             | 0                                                             | 0                                                 | 0    | 0.00               | 0.00               | 0.00                  |
