# Supplementary material
Source: PubMed Central journal article supplement (PMC3024309)

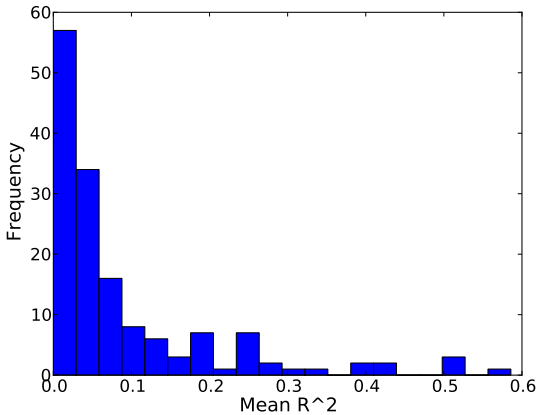

Supplement: pgen.1001276.s002.pdf [file pgen.1001276.s002.pdf]

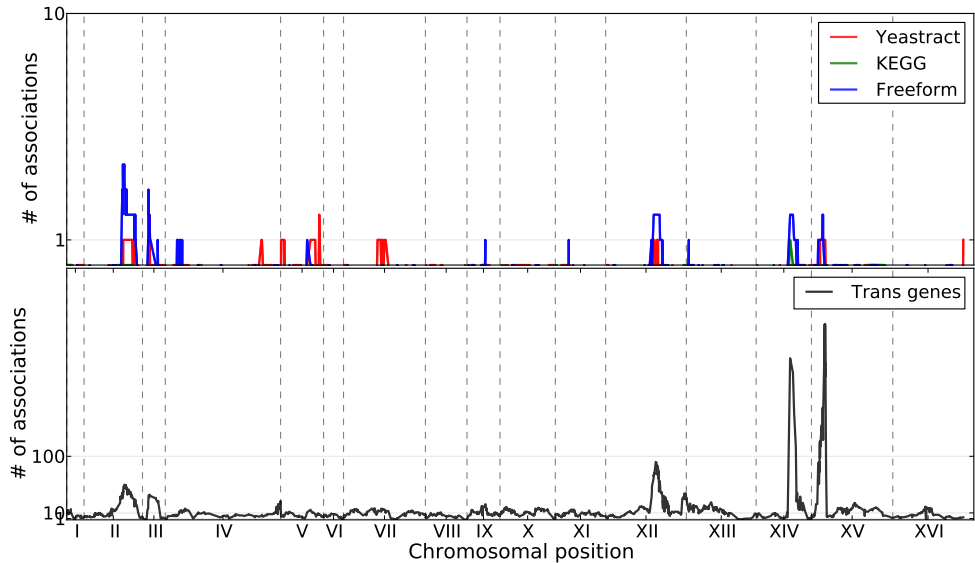

Supplement: pgen.1001276.s003.pdf [file pgen.1001276.s003.pdf]

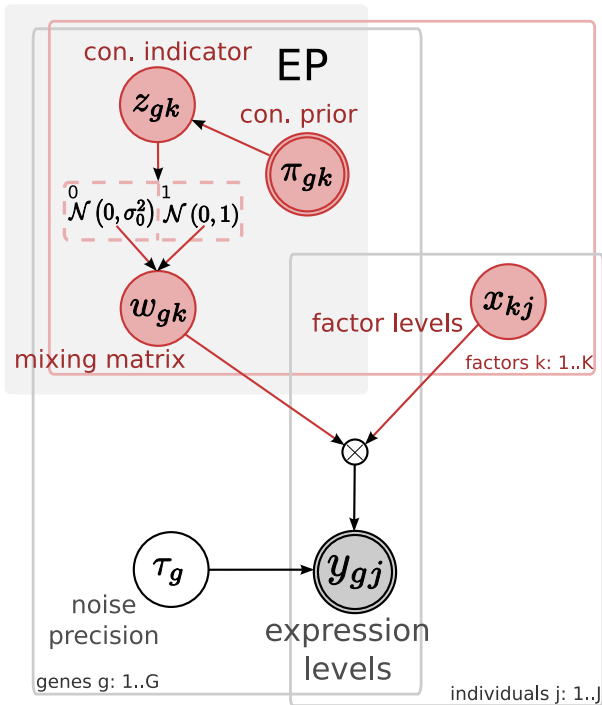

Supplement: pgen.1001276.s004.pdf [file pgen.1001276.s004.pdf]
